# Supplementary material for: A Cross-Sectional Survey of Medical Cannabis Users: Patterns of Use and Perceived Efficacy
Source: PubMed Central journal article supplement (PMC5549439; doi:10.1089/can.2016.0007), 2016-06-01

## Supplementary Data

**Supplementary Table S1. Summary of Perceived Efficacy Ratings for Each Medical Condition**

| Condition                | Mean | 95% CI         | Min. | Max. |
|--------------------------|------|----------------|------|------|
| Epilepsy                 | 4.43 | 3.95–4.90      | 1.4  | 5    |
| Appetite                 | 4.26 | 4.10–4.42      | 1    | 5    |
| Nausea                   | 4.22 | 4.12–4.32      | 1.1  | 5    |
| Colitis/Crohn's disease  | 4.19 | 3.88–4.50      | 1.5  | 5    |
| Seizures/spasticity      | 4.11 | 3.77–4.45      | 1.5  | 5    |
| Overall                  | 3.90 | 3.52–4.28      | 1.9  | 5    |
| Depression               | 3.76 | 3.66–3.85      | –0.2 | 5    |
| Tics                     | 3.66 | 3.18–4.14      | 0.3  | 5    |
| Cancer                   | 3.65 | 3.21–4.10      | 0.8  | 5    |
| Headaches/migraines      | 3.61 | 3.50–3.72      | 0.0  | 5    |
| Tremor                   | 3.58 | 3.00–4.16      | –0.9 | 5    |
| Spasticity               | 3.58 | 3.43–3.72      | 0.1  | 5    |
| Anxiety                  | 3.53 | 3.44–3.63      | –1.0 | 5    |
| Pain                     | 3.50 | 3.42–3.57      | 0.1  | 5    |
| Multiple sclerosis       | 3.49 | 2.82–4.17      | 1.0  | 5    |
| Irritable bowel syndrome | 3.48 | 3.29–3.66      | 0.0  | 5    |
| HIV                      | 2.80 | 1.45–4.15      | 0.0  | 4.7  |
| Glaucoma                 | 1.50 | — <sup>a</sup> | –0.1 | 3.10 |

Subjects used a slider bar for effect scale ranging from –5 to +5, with –5 representing worsening symptoms, 0 representing no change in symptoms, and +5 representing improving symptoms.

<sup>a</sup>Insufficient power to compute CI for glaucoma ( $n=2$ ).

CI, confidence interval.

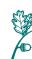

Supplement: Supp_Table1.pdf [file Supp_Table1.pdf]
